# Supplementary material for: Spatial and climatic variables independently drive elevational gradients in ant species richness in the Eastern Himalaya
Source: PLoS One. 2020 Jan 15;15(1):e0227628. doi: 10.1371/journal.pone.0227628 (PMC6961925; doi:10.1371/journal.pone.0227628)
Supplement: S1 Table — Species richness and predictor variables used in the regression analysis. The table shows data for observed, rarefied and interpolated species richness along with predictor variables measured at transect and elevation band levels. 'Understory Complexity' and 'Volume of Leaf Litter' were estimated at each transect, and 'Mean Annual Temperature' was taken from 'WorldClim' for each elevation band. (CSV) [file pone.0227628.s002.csv]

elevation	transect	litter.volume	mean_anual_temperature	field_measured_temperature	understory_vegetation_complexity	observed_species_richness_transect	rarefied_species_richness_transect	observed_species_richness_elevation	interpolated_species_richness_elevation	rarefied_species_richness_elevation
600	E3A/M2013	-0.903467656	1.328265987	1.145430859	0.656055098	28	20	84	84	26
600	E3B/M2013	-0.077988029	1.328265987	1.04658741	-0.215618	39	20	84	84	26
600	E3C/M2013	0.012405729	1.328265987	1.907937463	-1.70537155	52	29.356	84	84	26
600	E3D/M2013	0.093379926	1.328265987	1.766732537	-0.215618	37	20.17	84	84	26
800	E4A/M2013	0.806502743	1.092188102	0.792418542	-1.059125841	27	18	67	87	24
800	E4B/M2013	0.936143805	1.092188102	0.637093122	0.048522492	26	15	67	87	24
800	E4C/M2013	-0.553338881	1.092188102	1.314876771	-1.059125841	37	24.259	67	87	24
800	E4D/M2013	-0.009998718	1.092188102	1.484322683	0.048522492	46	30.166	67	87	24
1000	E5A/M2013	0.53726325	0.879718006	0.538249674	0.823912601	39	27	65	86	24
1000	E5B/M2013	-0.188392328	0.879718006	0.397044747	-0.776333473	29	24	65	86	24
1000	E5C/M2013	-1.571941434	0.879718006	0.919502976	0.823912601	36	18.918	65	86	24
1000	E5D/M2013	-0.883538823	0.879718006	0.919502976	-0.776333473	34	20.723	65	86	24
1200	E6A/M2013	-0.669908001	0.454777814	0.114634893	1.10590645	19	14	46	71	21
1200	E6B/M2013	0.437936778	0.454777814	0.100514401	0.439897526	20	16	46	71	21
1200	E6C/M2013	0.881837404	0.454777814	0.354683269	0.208036098	26	16.032	46	71	21
1200	E6D/M2013	0.232774294	0.454777814	0.354683269	0.138267538	29	17.729	46	71	21
1400	E7A/M2013	1.578601898	-0.005574061	0.099495663	0.195810931	19	17	42	64	21
1400	E7B/M2013	1.227983226	-0.005574061	0.04403243	-0.057837421	17	16	42	64	21
1400	E7C/M2013	1.156464969	-0.005574061	0.04403243	0.23375797	28	17.23	42	64	21
1400	E7D/M2013	-0.217390683	-0.005574061	0.128755386	1.279180694	26	17.388	42	64	21
1600	E8A/M2013	-0.04253353	-0.25345584	-0.181895453	0.645504144	24	17	41	59	20
1600	E8B/M2013	0.761501747	-0.25345584	-0.181895453	1.772816339	20	13	41	59	20
1600	E8C/M2013	-1.549335591	-0.25345584	-0.125413482	1.212939866	21	8.092	41	59	20
1600	E8D/M2013	1.080160878	-0.25345584	-0.210136438	0.523068519	18	9.843	41	59	20
1800	E9A/M2013	1.907173025	-0.545602222	-0.478425799	0.756903685	10	9	27	42	16
1800	E9B/M2013	2.362340333	-0.545602222	-0.506666785	0.165846975	15	9	27	42	16
1800	E9C/M2013	-0.571842022	-0.545602222	-0.492546292	0.208059934	11	7.41	27	42	16
1800	E9D/M2013	0.487581492	-0.545602222	-0.492546292	0.828368677	17	10.951	27	42	16
2200	E11A/M2013	-1.273267307	-1.253835876	-1.735149648	-1.759041446	7	5	26	29	19
2200	E11B/M2013	-1.094052065	-1.253835876	-1.085606984	-1.932826868	5	5	26	29	19
2200	E11C/M2013	-0.91496859	-1.253835876	-1.029125014	-0.673889413	12	8.036	26	29	19
2200	E11D/M2013	-0.718684024	-1.253835876	-1.114932581	-1.046924231	13	6.546	26	29	19
2400	E12A/M2013	-0.354004838	-1.696481909	-1.920284996	2.126832776	3	2	6	6	6
2400	E12B/M2013	-0.453016117	-1.696481909	-1.90459556	-1.196147531	2	1	6	6	6
2400	E12C/M2013	-1.706752276	-1.696481909	-1.283293882	-0.171917128	3	2	6	6	6
2400	E12D/M2013	-0.745630586	-1.696481909	-1.368016838	-1.596013191	4	2.44	6	6	6
