# Supplementary material for: Spatial and climatic variables independently drive elevational gradients in ant species richness in the Eastern Himalaya
Source: PLoS One. 2020 Jan 15;15(1):e0227628. doi: 10.1371/journal.pone.0227628 (PMC6961925; doi:10.1371/journal.pone.0227628)
Supplement: S2 Table — Data on elevational extents of species used in the geometric constraints analysis. The table shows data on interpolated range extents of species represented by lowest (min) and the highest (max) elevations. 'range' represents the elevational extents, 'mid' the mid-point of the elevational extents, and 'num_bands' the number of elevation bands at which each species is recorded, after interpolation. (CSV) [file pone.0227628.s003.csv]

Morpho-species code	min	max	range	mid	num_zones
sp_1	1400	1400	0	1400	1
sp_2	1400	1400	0	1400	1
sp_3	1000	1000	0	1000	1
sp_4	2200	2200	0	2200	1
sp_5	1800	1800	0	1800	1
sp_6	800	1200	400	1000	3
sp_7	600	600	0	600	1
sp_8	1000	1000	0	1000	1
sp_9	800	1000	200	900	2
sp_10	800	1000	200	900	2
sp_11	600	1200	600	900	4
sp_12	600	1800	1200	1200	7
sp_13	1200	1800	600	1500	4
sp_14	800	2200	1400	1500	7
sp_15	800	2400	1600	1600	8
sp_16	1200	2200	1000	1700	5
sp_17	800	1000	200	900	2
sp_18	800	1000	200	900	2
sp_19	1000	1000	0	1000	1
sp_20	1000	1000	0	1000	1
sp_21	600	1000	400	800	3
sp_22	600	1000	400	800	3
sp_23	1000	1000	0	1000	1
sp_24	1200	1600	400	1400	3
sp_25	600	2200	1600	1400	8
sp_26	600	1600	1000	1100	6
sp_27	1600	1600	0	1600	1
sp_28	600	600	0	600	1
sp_29	1200	1800	600	1500	4
sp_30	600	1600	1000	1100	6
sp_31	600	1000	400	800	3
sp_32	600	600	0	600	1
sp_33	600	800	200	700	2
sp_34	600	600	0	600	1
sp_35	600	600	0	600	1
sp_36	600	1200	600	900	4
sp_37	600	800	200	700	2
sp_38	1000	1200	200	1100	2
sp_39	600	800	200	700	2
sp_40	800	800	0	800	1
sp_41	800	1800	1000	1300	6
sp_42	800	1200	400	1000	3
sp_43	600	600	0	600	1
sp_44	600	600	0	600	1
sp_45	2200	2200	0	2200	1
sp_46	600	2200	1600	1400	8
sp_47	800	800	0	800	1
sp_48	1000	2200	1200	1600	6
sp_49	1200	2200	1000	1700	5
sp_50	1600	2200	600	1900	3
sp_51	1600	1600	0	1600	1
sp_52	800	800	0	800	1
sp_53	600	2200	1600	1400	8
sp_54	600	600	0	600	1
sp_55	800	800	0	800	1
sp_56	600	600	0	600	1
sp_57	1200	1200	0	1200	1
sp_58	600	2200	1600	1400	8
sp_59	600	800	200	700	2
sp_60	1400	2200	800	1800	4
sp_61	800	800	0	800	1
sp_62	600	600	0	600	1
sp_63	600	1000	400	800	3
sp_64	600	1600	1000	1100	6
sp_65	1000	1000	0	1000	1
sp_66	800	1400	600	1100	4
sp_67	600	1800	1200	1200	7
sp_68	600	1800	1200	1200	7
sp_69	600	1600	1000	1100	6
sp_70	800	1600	800	1200	5
sp_71	600	1200	600	900	4
sp_72	800	800	0	800	1
sp_73	600	1000	400	800	3
sp_74	600	1400	800	1000	5
sp_75	600	600	0	600	1
sp_76	600	1600	1000	1100	6
sp_77	600	600	0	600	1
sp_78	1000	1000	0	1000	1
sp_79	600	2200	1600	1400	8
sp_80	2400	2400	0	2400	1
sp_81	800	1600	800	1200	5
sp_82	800	2200	1400	1500	7
sp_83	1000	1000	0	1000	1
sp_84	1200	1600	400	1400	3
sp_85	600	1000	400	800	3
sp_86	600	600	0	600	1
sp_87	600	600	0	600	1
sp_88	600	1600	1000	1100	6
sp_89	600	600	0	600	1
sp_90	600	1200	600	900	4
sp_91	600	1800	1200	1200	7
sp_92	600	600	0	600	1
sp_93	600	1000	400	800	3
sp_94	600	2200	1600	1400	8
sp_95	800	800	0	800	1
sp_96	600	2200	1600	1400	8
sp_97	1800	1800	0	1800	1
sp_98	1800	1800	0	1800	1
sp_99	600	600	0	600	1
sp_100	1000	1600	600	1300	4
sp_101	1800	1800	0	1800	1
sp_102	600	1200	600	900	4
sp_103	2200	2200	0	2200	1
sp_104	800	1800	1000	1300	6
sp_105	1000	1000	0	1000	1
sp_106	600	1800	1200	1200	7
sp_107	1000	1800	800	1400	5
sp_108	600	1600	1000	1100	6
sp_109	800	1600	800	1200	5
sp_110	1400	2200	800	1800	4
sp_111	600	2200	1600	1400	8
sp_112	1400	1400	0	1400	1
sp_113	600	2400	1800	1500	9
sp_114	600	600	0	600	1
sp_115	600	1000	400	800	3
sp_116	600	600	0	600	1
sp_117	600	1000	400	800	3
sp_118	600	2200	1600	1400	8
sp_119	600	2400	1800	1500	9
sp_120	800	1200	400	1000	3
sp_121	1200	1200	0	1200	1
sp_122	600	600	0	600	1
sp_123	800	800	0	800	1
sp_124	600	600	0	600	1
sp_125	600	1600	1000	1100	6
sp_126	800	1600	800	1200	5
sp_127	1400	1400	0	1400	1
sp_128	600	1200	600	900	4
sp_129	600	600	0	600	1
sp_130	600	800	200	700	2
sp_131	1200	1600	400	1400	3
sp_132	1000	1000	0	1000	1
sp_133	600	800	200	700	2
sp_134	600	600	0	600	1
sp_135	600	1600	1000	1100	6
sp_136	600	1600	1000	1100	6
sp_137	600	800	200	700	2
sp_138	600	1400	800	1000	5
sp_139	1400	1400	0	1400	1
sp_140	600	2200	1600	1400	8
sp_141	600	800	200	700	2
sp_142	600	1800	1200	1200	7
sp_143	600	600	0	600	1
sp_144	2200	2400	200	2300	2
sp_145	800	2400	1600	1600	8
sp_146	800	1800	1000	1300	6
sp_147	1800	2200	400	2000	2
sp_148	1000	1000	0	1000	1
sp_149	600	2200	1600	1400	8
sp_150	600	1600	1000	1100	6
sp_151	600	1200	600	900	4
sp_152	1000	1200	200	1100	2
sp_153	600	1800	1200	1200	7
sp_154	600	2200	1600	1400	8
sp_155	600	600	0	600	1
sp_156	600	1600	1000	1100	6
sp_157	800	800	0	800	1
